# Supplementary material for: Reaction cavities of liquid and solid phases of a long n-alkane, n-nonadecane, as probed by the regio- and stereo-chemical fates of two singlet radical pairs
Source: Royal Society of Chemistry journal article supplement (doi:10.1039/b416610h), 2005-01-05
Supplement: b416610h.pdf [file b416610h.pdf]

Supporting Information for

**Reaction Cavities of Liquid and Solid Phases of a Long *n*-Alkane, *n*-Nonadecane, as Probed by the Regio- and Stereo-Chemical Fates of Two Singlet Radical Pairs**

Jinqi Xu and Richard G. Weiss\*

Department of Chemistry, Georgetown University, Washington, DC, USA 20057-1227

Email: weissr@georgetown.edu

**Results from Irradiations of (*R*)-**2** in *n*-Nonadecane**

Both the **2BN/4BN** product ratios and *ees* of the remaining **2** vary with its degree of conversion upon irradiation in *n*-nonadecane. The presence of a significant amount of (*S*)-**2** at higher conversions of (*R*)-**2** requires that both enantiomers be considered in analyses of the reactions, including those dealing with the kinetics. Furthermore, secondary photoreactions of **2BN** and **4BN**<sup>1</sup> or of their keto precursors prior to tautomerization<sup>2</sup> can also complicate analyses. However, at conversions approaching 0%, the amount of (*S*)-**2** and secondary photoproducts are mechanistically inconsequential. Therefore, the relative yields in hexane and the other media reported in Table 2 have been extrapolated to 0% conversion of (*R*)-**2** using linear regressions of data from conversions in the range of 2-30%.

**Table S1.** Product distributions<sup>a</sup> from reactions of (*R*)-**2** in the hexagonal phase of *n*-nonadecane at 25 °C.

| % Conversion of ( <i>R</i> )- <b>2</b> | <b>2BN</b> | <b>4BN</b> | <b>3</b> | <b>5</b> | <b>2BN/4BN</b> |
|----------------------------------------|------------|------------|----------|----------|----------------|
| 3                                      | 21.6±1.3   | 40.8±1.9   | 19.3±1.3 | 18.4±1.0 | 0.53±0.04      |
| 5                                      | 19.6±1.1   | 40.7±2.5   | 21.7±1.1 | 17.9±1.0 | 0.48±0.04      |
| 7                                      | 18.9±1.1   | 40.9±1.7   | 24.9±1.6 | 15.3±1.0 | 0.46±0.03      |
| 8                                      | 17.4±1.1   | 40.6±1.8   | 25.3±1.5 | 16.7±1.0 | 0.43±0.03      |
| 10                                     | 17.5±0.5   | 39.7±0.5   | 26.8±1.0 | 16.1±1.0 | 0.44±0.03      |
| 11                                     | 14.8±0.5   | 40.5±0.5   | 30.5±1.0 | 14.3±1.0 | 0.37±0.02      |
| 14                                     | 13.8±0.5   | 40.0±2.2   | 30.1±1.1 | 16.1±1.0 | 0.35±0.02      |
| 15                                     | 13.9±0.5   | 41.3±0.5   | 32.3±1.3 | 12.5±1.0 | 0.34±0.02      |

<sup>a</sup> Relative yield (%); the sum of all products is taken as 100%; mass balance is > 80%.

**Table S2.** *Ee%* of products from irradiations of (*R*)-**2** in the hexagonal phase of *n*-nonadecane at 25 °C.<sup>a</sup>

| % Conversion of ( <i>R</i> )- <b>2</b> | <i>ee%</i>                      |            |            |
|----------------------------------------|---------------------------------|------------|------------|
|                                        | remaining <b>2</b> <sup>b</sup> | <b>2BN</b> | <b>4BN</b> |
| 3                                      | 99.2                            | 56.6       | 29.0       |
| 5                                      | 99.0                            | 56.4       | 28.8       |
| 7                                      | 98.6                            | 54.0       | 28.6       |
| 8                                      | 98.4                            | 51.1       | 27.7       |
| 10                                     | 98.0                            | 53.2       | 27.8       |
| 11                                     | 98.0                            | 51.6       | 28.0       |
| 14                                     | 97.6                            | 50.8       | 26.8       |
| 15                                     | 97.2                            | 49.6       | 26.6       |

<sup>a</sup> ± 1.0%; *ee* of (*R*)-**2** before irradiation is 99.5%. <sup>b</sup> (*R*)-enantiomer in excess.

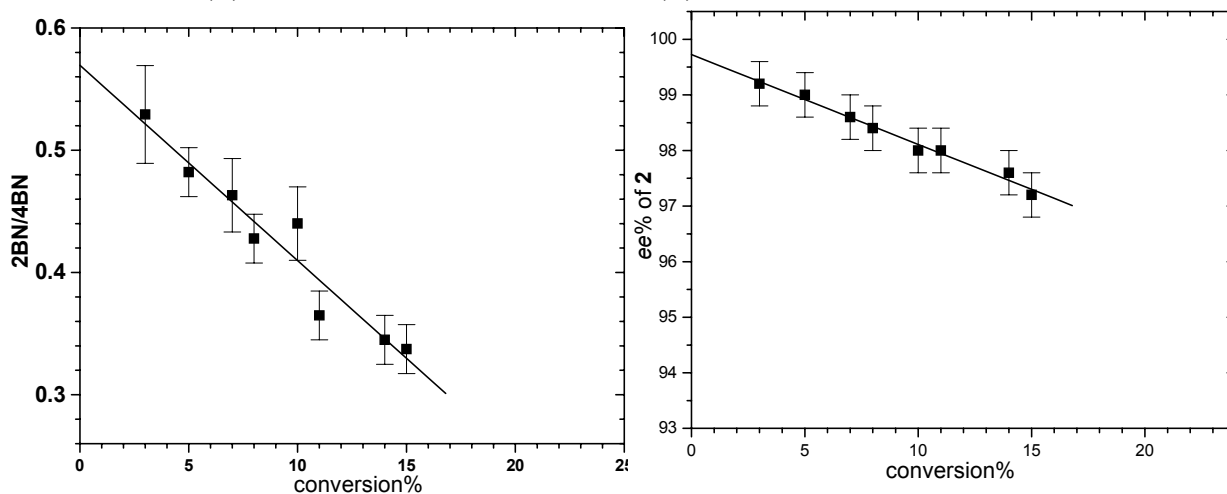

**Figure S1.** The **2BN/4BN** product ratio (left) and *ee%* of **2** (right) versus % conversion for irradiations of (*R*)-**2** in *n*-nonadecane at 25 °C.

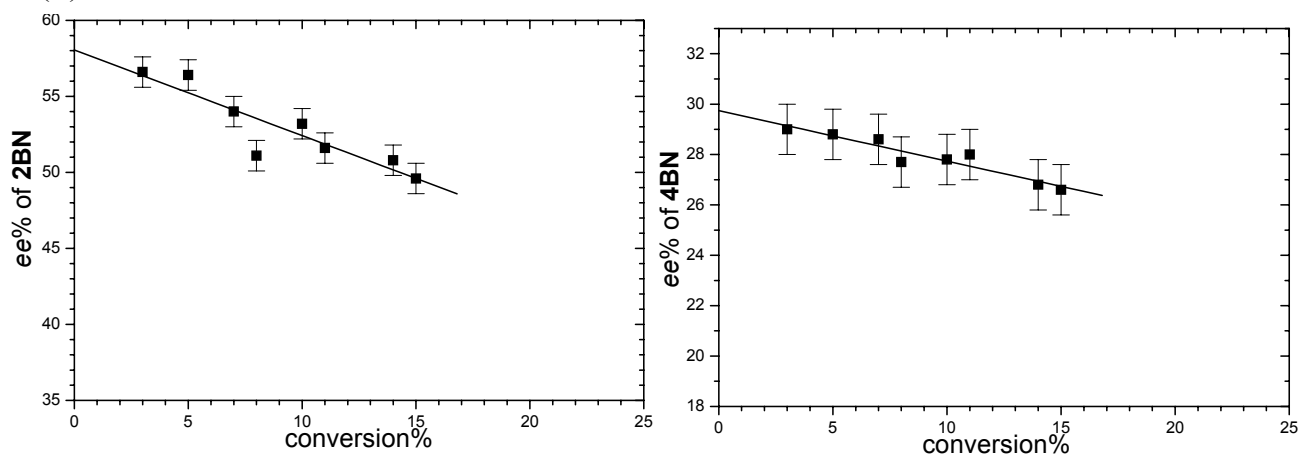

**Figure S2.** *Ee%* of **2BN** (left) and **4BN** (right) versus % conversion for irradiations of (*R*)-**2** in *n*-nonadecane at 25 °C.

**Table S3.** Product distributions<sup>a</sup> from reactions of (*R*)-**2** in the orthorhombic phase of *n*-nonadecane at 5 °C.

| % Conversion of ( <i>R</i> )- <b>2</b> | <b>2BN</b> | <b>4BN</b> | <b>3</b> | <b>5</b> | <b>2BN/4BN</b> |
|----------------------------------------|------------|------------|----------|----------|----------------|
| 1                                      | 23.5±1.8   | 42.5±1.8   | 25.4±1.8 | 8.6±1.0  | 0.55±0.04      |
| 2                                      | 22.3±1.0   | 44.8±1.0   | 24.8±1.0 | 8.1±1.0  | 0.50±0.04      |
| 4                                      | 17.6±1.0   | 43.4±1.0   | 31.7±1.0 | 7.3±1.0  | 0.41±0.04      |
| 5                                      | 18.6±0.8   | 45.0±1.7   | 26.9±1.4 | 9.5±1.0  | 0.41±0.04      |
| 7                                      | 7.7±1.5    | 35.6±1.5   | 49.9±1.5 | 6.8±1.0  | 0.22±0.04      |

<sup>a</sup> Relative yield (%); the sum of all products is taken as 100%; mass balance is > 80%.

**Table S4.** *Ee*% of products from reactions of (*R*)-**2** in the orthorhombic phase of *n*-nonadecane at 5 °C.<sup>a</sup>

| % Conversion of ( <i>R</i> )- <b>2</b> | remaining <b>2</b> <sup>b</sup> | <i>ee</i> % |            |
|----------------------------------------|---------------------------------|-------------|------------|
|                                        |                                 | <b>2BN</b>  | <b>4BN</b> |
| 1                                      | 99.2                            | 61.4        | 31.9       |
| 2                                      | 99.0                            | 58.9        | 32.3       |
| 4                                      | 98.8                            | 58.0        | 31.9       |
| 7                                      | 98.0                            | 55.4        | 32.0       |
| 7                                      | 98.4                            | 55.8        | 31.2       |
| 14                                     | 97.8                            | 54.6        | 31.8       |

<sup>a</sup> ± 1.0%; *ee* of (*R*)-**2** before irradiation is 99.5%. <sup>b</sup> (*R*)-enantiomer in excess

## References

<sup>1</sup> Both **2BN** and **4BN** have strong absorbances at ca. 280-320nm (i.e., within the wavelength region of irradiation). Control experiments demonstrate that: (1) photolysis of **2BN** produces a small amount (ca. 10%) of **4BN** and other compounds, but **4BN** does not generate **2BN**; (2) the disappearance rate of **2BN** is much faster than that of **4BN** when their mixture is irradiated at > 300 nm.

<sup>2</sup> (a) M. C. Jiménez, M. A. Miranda, J. C. Scaiano and R. Tormos, Two-photon processes in the photo-Claisen and photo-Fries rearrangements. Direct observation of dienic ketenes generated by photolysis of transient cyclohexa-2,4-dienones, *Chem. Commun.*, 1997, **16**, 1487-1488; (b) T. Mori, M. Takamoto, H. Saito, T. Furo, T. Wada and Y. Inoue, Remarkable differences in photo and thermal (acid-catalyzed) reactivities between *ortho*- and *para*-acylcyclohexadienones as essential factors determining the overall efficiency of the photo-Fries rearrangement, *Chem. Lett.*, 2004, **33**, 256-257.
